# Supplementary material
Source: publisher figshare collection journal article supplement (https://karger.figshare.com/ndownloader/files/15603242)
Supplement: Supplementary file 1 [file 15603242]

**Supplementary Material**

**Table 1.** Correlation between T:R ratios in anterior and inferior leads and basic demographic and clinical characteristics of our study population.

|  | T:R anterior | | T:R inferior | |
| --- | --- | --- | --- | --- |
|  | p-value | Correlation coefficient | p-value | Correlation coefficient |
| Sex, n (men/women), (%) | 0.24 | 0.100 | 0.68 | -0.036 |
| Age, yr | 0.15 | 0.084 | 0.04 | 0.123 |
| Body Mass index, (kg/m²) | 0.38 | 0.051 | 0.57 | 0.033 |
| Smokers, n (%)  Current smokers, n (%)  Previous smokers, n (%) | 0.11 0.40 | 0.138 -0.073 | 0.61 0.77 | -0.044  0.025 |
| Previous diagnosis, n (%)  Diabetes mellitus 1 or 2  CAD  NSTEMI  Coronary stent implantation  Coronary artery bypass  Peripheral artery occlusive disease  Prior stroke  Cardiac defect  Cardiac arrhythmia  Congestive heart failure  Left ventricular hypertrophy | 0.20 0.78 0.25 0.81 0.62 0.14 0.10 0.34 0.34 0.51 0.71 | 0.108 -0.024  0.098 -0.020  0.043  0.125  0.142 -0.082  0.082  0.056 -0.031 | 0.58 0.73 0.96 0.78 0.91 0.82 0.80  0.89 0.10 0.45 0.69 | 0.048  0.030 -0.005  0.024  0.010  0.019 -0.022 -0.012 -0.140  0.065 -0.035 |
| Cause of ERSD, n (%)  Diabetic nephropathy  Hypertensive nephroslerosis  Glomerulonephritis  Interstitial nephritis  Polycystic kidney disease  Hereditary  Unknown  Others | 0.08 0.38 0.26 0.31 0.53 0.85 0.33 0.59 | 0.149  0.075 -0.097 -0.086  0.053  0.016 -0.083  0.046 | 0.47 0.87 0.55 0.97 0.88 0.83 0.86 0.70 | 0.062  0.014 -0.051 -0.003 -0.013  0.018 -0.015  0.033 |
| Medications, n (%)  ACE inhibitor  ß-Blocker  Angiotensin II-receptor antagonist  Calcium channel blocker  Sympatholytics  Diuretic  Cinalcalcet  Vitamin D  Phenprocoumon  ASS  Erythropoetin  Statin  Allopurinol | 0.41 0.52 0.46 0.21 0.32 0.98 0.004 0.34 0.92 0.97 0.24 0.40 0.97 | -0.071  0.055 -0.063  0.107  0.085  0.002  0.242 -0.081 -0.009 -0.004 -0.101 -0.072  0.003 | 0.04 0.19 0.47 0.81 0.42 0.12 0.78 0.20 0.91 0.95 0.30 0.33 0.22 | -0.180 -0.113 -0.062 -0.020 -0.068 -0.134  0.024  0.109  0.010 -0.005  0.088 -0.083 -0.106 |
| Laboratory values of the day of listing  eGFR (CKD-Epi), ml/min  Sodium, mmol/l  Potassium, mmol/l  Calcium, mmol/l  Total Protein, g/l  Albumin, %  Phosphorus, mmol/l  Alkaline Phosphatase, U/l  Triglycerides, mg/dl  Cholesterol, mg/dl  HDL, mg/dl  LDL, mg/dl  Glucose, mg/dl  HbA1c, %  Uric acid, mg/dl  Leukocytes, G/l  Hemoglobin, g/dl  Thrombocytes, G/l  Prothrombin time, %  PTT, sec  AT, %  Fibrinogen, mg/dl Further laboratory variables  eGFR (CKD-Epi) day of discharge  after transplantation, ml/min  eGFR (CKD-Epi) 1-year follow up,   ml/min | 0.08  0.83 0.006  0.97  0.01  0.47  0.04  0.26  0.05  0.46  0.52  0.17  0.33  0.03  0.16  0.79  0.003  0.49  0.47  0.76  0.21  0.68  0.57  0.77 | -0.103  -0.013  0.163  -0.002  0.148  -0.043  0.118  -0.065  -0.112  -0.043  0.042  -0.089  0.057  0.129  -0.082  0.015  0.174  0.040  0.049  -0.019  -0.079  0.026  -0.034  -0.018 | 0.07  0.76  0.10  0.67  0.62  0.28  0.15  0.68  0.49  0.36  0.09  0.76  0.77  0.96  0.40  0.28  0.61  0.55  0.46  0.63  0.06  0.87  0.35  0.39 | -0.106  -0.018  0.097  -0.025  -0.029  0.065  0.083  -0.024  -0.040  0.053  0.112  -0.020  -0.017  -0.003  -0.049  -0.063  0.030  -0.035  0.050  -0.030  -0.118  -0.010  -0.055  -0.051 |
| Previous kidney transplant, n (%) | 0.19 | 0.112 | 0.37 | -0.077 |
| Dialysis-related information  CAPD, n (%)  HD, n (%)  Duration of dialysis, hr/wk  Diuresis on day of listing, ml  Frequency of dialysis, d/wk | 0.02  0.02  0.56  0.66  0.60 | -0.204  0.209  0.042  -0.026  -0.041 | 0.94  0.74  0.79  0.75  0.37 | 0.007  0.028  0.020  -0.019  0.071 |
| Transplantation-related information  Time to transplantation, yr  Diuresis before transplantation, ml | 0.87  0.91 | 0.010  0.007 | 0.40  0.21 | 0.049  -0.075 |

CAD, coronary artery disease; NSTEMI, non ST elevation myocardial infarction; ACE inhibitor, angiotensin-converting enzyme inhibitor; PTT, partial thromboplastin time; AT, antithrombin; CAPD, continuously ambulatory peritoneal disease; HD, hemodialysis.
